# Supplementary material for: Intranasal SARS-CoV-2 RBD decorated nanoparticle vaccine enhances viral clearance in the Syrian hamster model
Source: PubMed Central journal article supplement (PMC10923206; doi:10.1128/spectrum.04998-22), 2024-02-09
Supplement: spectrum.04998-22-s0001.pdf [file spectrum.04998-22-s0001.pdf]

1 **SUPPLEMENTAL FIGURES, TABLES, AND FILES**

2 **Supplemental Figure 1. Evaluation of the immunogenicity of RBD+SpyCage determined**

3 **by serum IgG and neutralizing antibody titers.** Shown are the antibody titers from Trial 1 that

4 evaluated immunogenicity of the RBD+SpyCage vaccine in hamsters. Plotted are (A) IgG

5 antibody titers in serum samples collected on days 0, 26, and 55, and (B) neutralizing antibody

6 titers against SARS-CoV-2 on day 0 and 55. \* significantly different from all other groups,

7 ( $p < 0.001$ ) determined by Kruskal-Wallis test with Dunn's multiple comparison correction.

8

9 **Supplemental Figure 2. Weight loss and viral titers in the nasal turbinates and lungs after**

10 **SARS-CoV-2 challenge of vaccinated hamsters.** After viral challenge, hamsters in Trial 1

11 (immunogenicity study) hamsters were monitored for (A) weight loss, and viral titers were

12 evaluated in (B) lung tissues and (C) nasal turbinates on days 3 and 6 post-infection.

13

14 **Supplemental Figure 3. Weight loss in unvaccinated hamsters after challenge with  $10^5$ ,**

15  **$10^4$ , and  $10^3$  TCID<sub>50</sub> of SARS-CoV-2.** To determine if lower challenge doses of SARS-CoV-2

16 would induce weight loss, equal numbers of male and female hamsters ( $n=3/\text{sex}$ ,  $n=6/\text{group}$ )

17 were intranasally inoculated with  $10^5$ ,  $10^4$ , and  $10^3$  TCID<sub>50</sub> of SARS-CoV-2/USA/WA1/2020.

18 Weight loss was then monitored for 14 days until the animals recovered.

19

20 **Supplemental Figure 4. Lung histopathology scoring for multiple parameters in**

21 **vaccinated hamsters challenged with SARS-CoV-2.** On days 3, 5, and 7 post-infection, lung

22 tissues were processed for H&E staining and scored by a veterinary pathologist. Panels display

23 scoring for (A) Type II Pneumocyte Hyperplasia, (B) Alveoli Pathology, (C) Hemorrhage, (D)

24 Blood Vessels Pathology, and (E) Bronchi Pathology. Black horizontal lines indicate median

25 score with the distribution of scores displayed as violin plots.

26

- 27 **Supplementary Table 1: Cryo-EM data collection, processing, and model refinement**  
28 **statistics.**  
29  
30 **Supplemental File 1. Sequences of plasmids used in this study.**

**(A)****IgG Antibody Titers**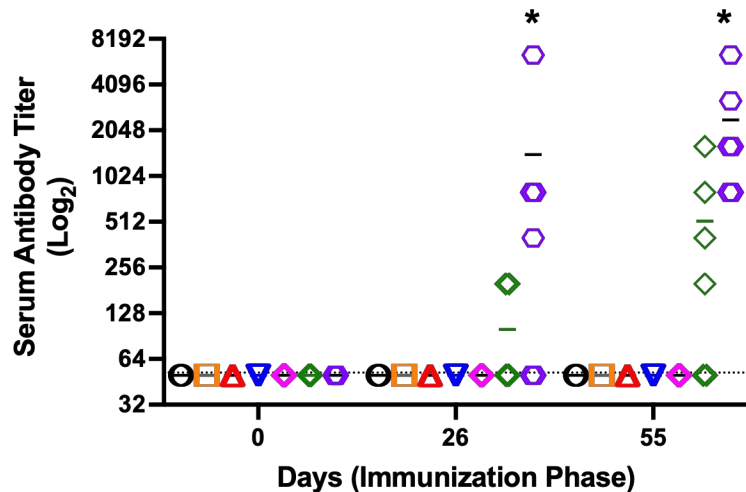**(B)****Neutralizing Antibodies**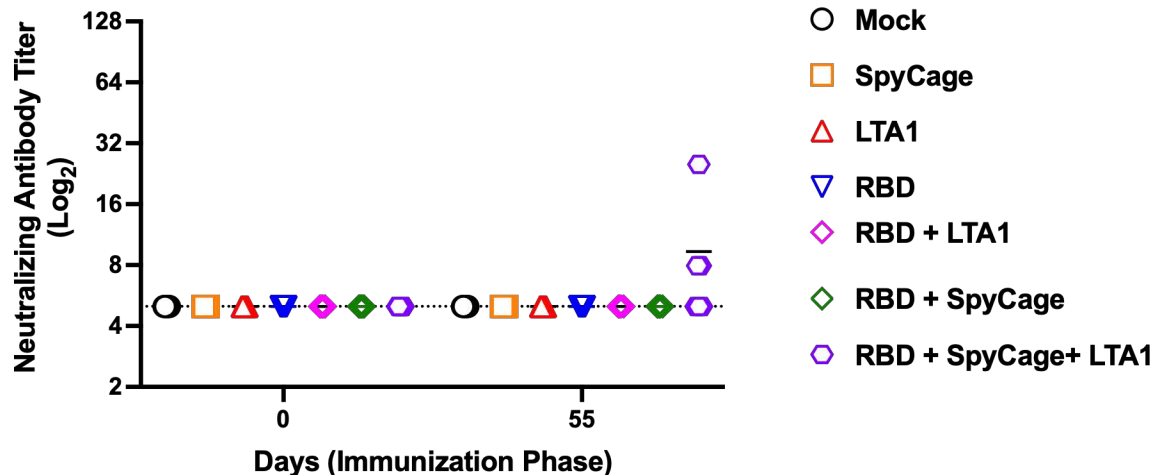

- Mock
- SpyCage
- △ LTA1
- ▽ RBD
- ◇ RBD + LTA1
- ◇ RBD + SpyCage
- ◇ RBD + SpyCage+ LTA1

**Figure S1**

**(A)**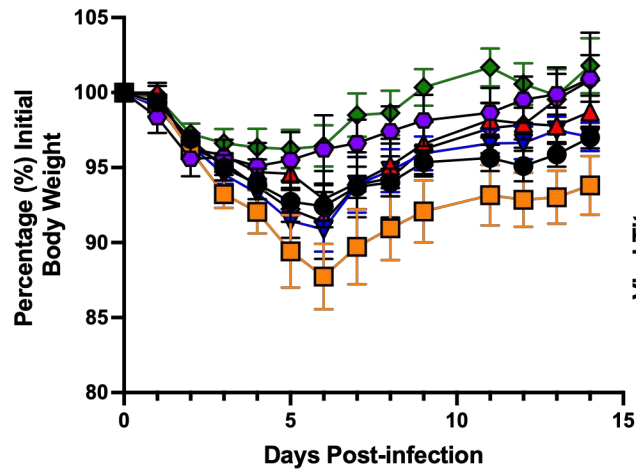

● Mock

■ SpyCage

**(B)**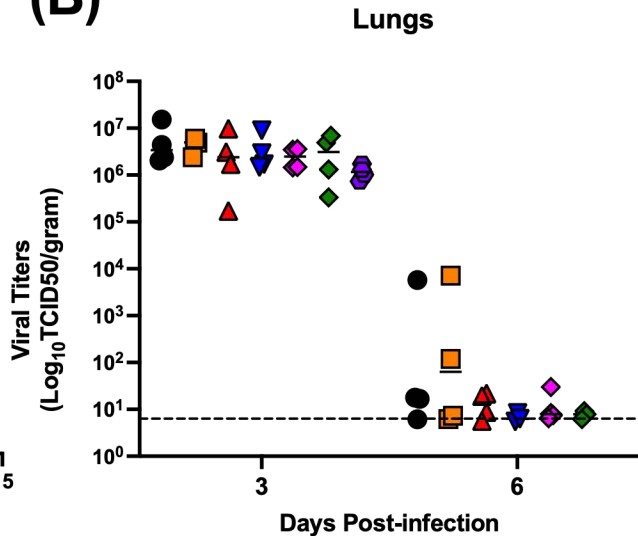

▼ RBD

▲ LTA1

◆ RBD + LTA1

◆ RBD + SpyCage

**(C)**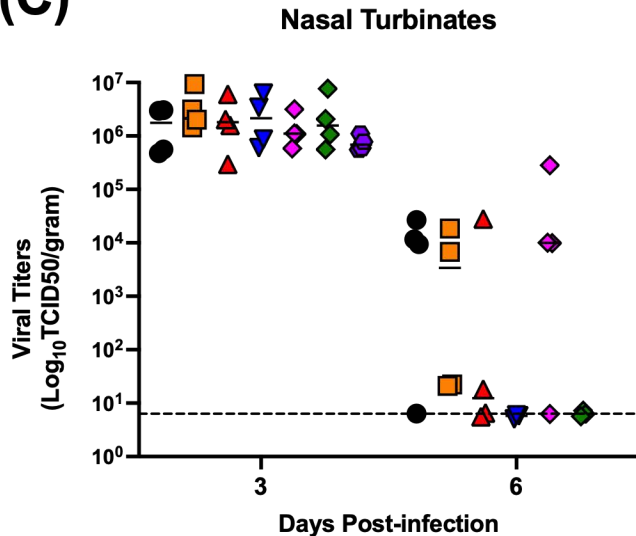

◆ RBD + SpyCage+ LTA1

**Figure S2**

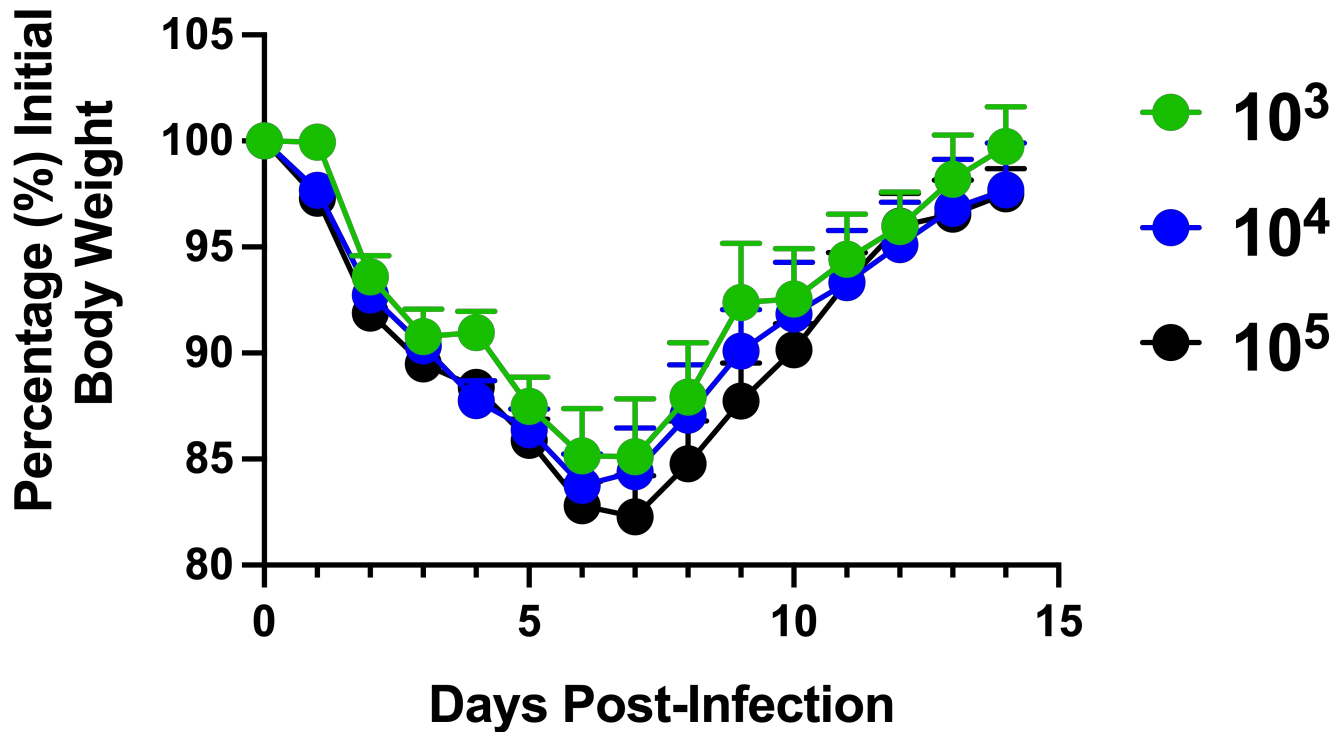

Figure S3

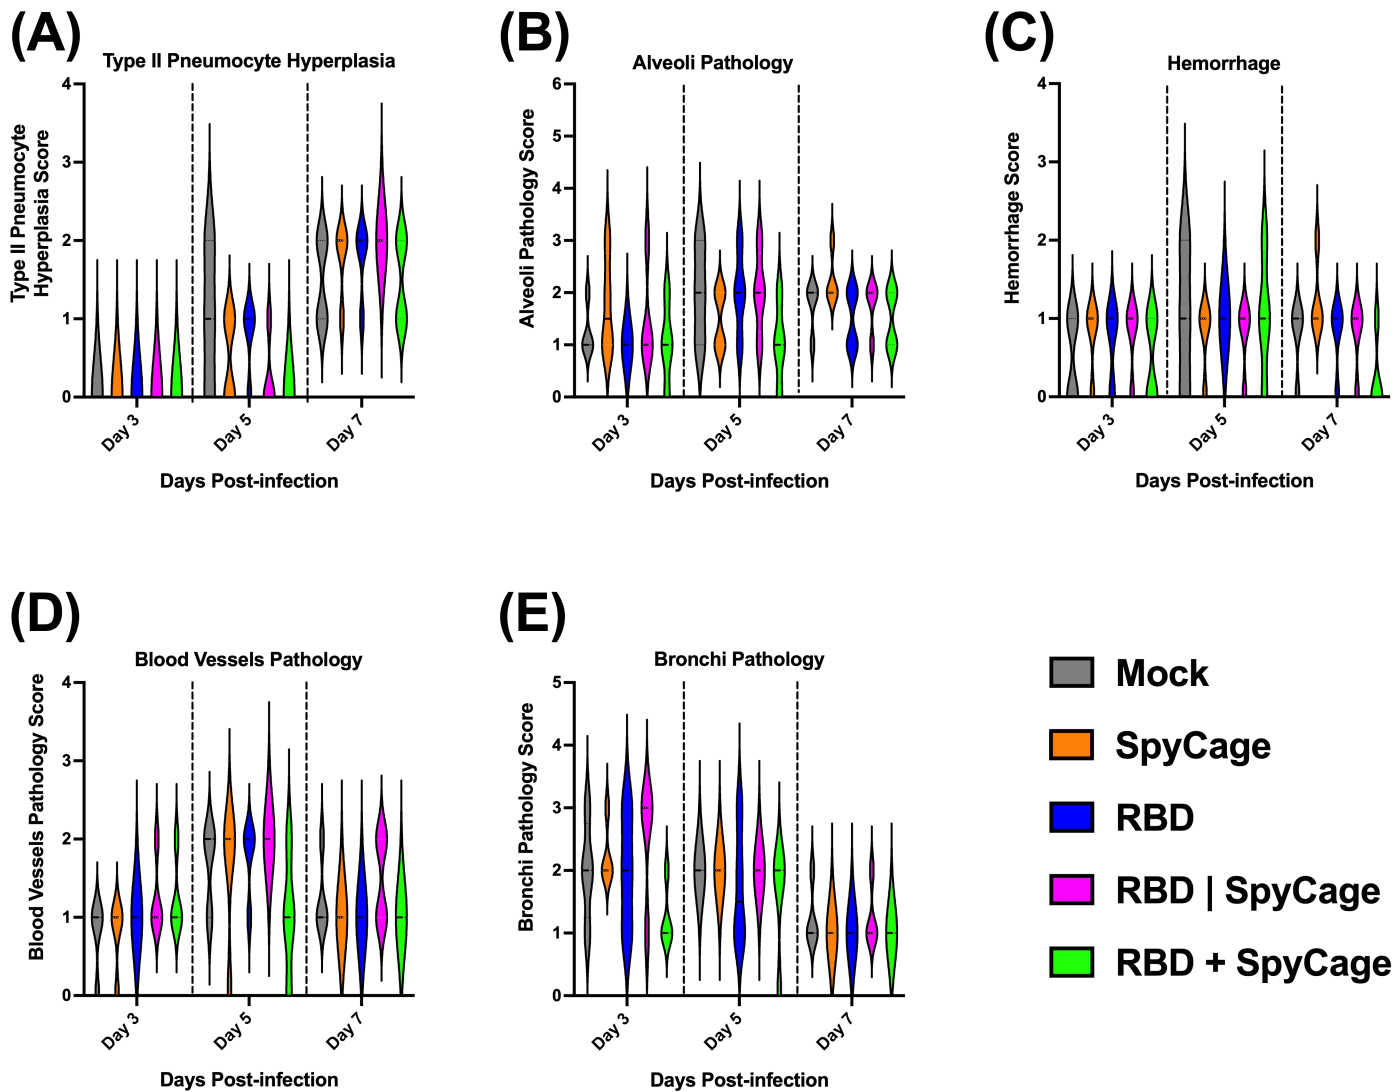

**Figure S4**

## Supplementary Table 1: Cryo-EM data collection, processing, and model refinement statistics

### Data collection and processing

|                                            |              |
|--------------------------------------------|--------------|
| Microscope                                 | Titan Krios  |
| Detector                                   | Falcon 3EC   |
| Voltage (kV)                               | 300          |
| Recording mode                             | Counting     |
| Nominal magnification                      | x59,000      |
| Electron exposure ( $e^-/\text{\AA}^2$ )   | 45           |
| No. of frames                              | 39           |
| Defocus range ( $\mu\text{m}$ )            | -1.2 to -3.0 |
| Pixel size ( $\text{\AA}$ )                | 1.11         |
| Symmetry                                   | Icosahedral  |
| Initial particles (no.)                    | 129,792      |
| Final particles (no.)                      | 63,430       |
| Map resolution ( $\text{\AA}$ )            | 3.4          |
| FSC Threshold                              | 0.143        |
| Map sharpening B-factor ( $\text{\AA}^2$ ) | -196.1       |

### Model refinement

|                                     |       |
|-------------------------------------|-------|
| Initial model used                  | 13-01 |
| FSC model vs. map at FSC=0.5        | 3.77  |
| CC model vs. map (masked)           | 0.77  |
| Average B-factor ( $\text{\AA}^2$ ) | 69.1  |
| Bond length rmsd ( $\text{\AA}$ )   | 0.002 |
| Bond angle rmsd ( $^\circ$ )        | 0.562 |

### Model composition

|                          |                 |
|--------------------------|-----------------|
| No. of chains            | 60              |
| Non-hydrogen atoms/chain | 1,519           |
| protein residues/chain   | 201 (aa 22-222) |

### Validation

|                   |      |
|-------------------|------|
| Molprobity score  | 1.5  |
| Clashscore        | 9.4  |
| Poor rotamers (%) | none |

### Ramachandran plot

|                |       |
|----------------|-------|
| Favored (%)    | 97.99 |
| Allowed (%)    | 2.01  |
| Disallowed (%) | none  |

**Supplemental File 1: Sequences of plasmids used in this study.**

```
>pSL1013_Apo_Cage_Expression_Plasmid
LOCUS   pSL1013           5916 bp DNA    circular  20-JUL-2022
DEFINITION .
ACCESSION
VERSION
SOURCE .
ORGANISM .
COMMENT  pET29b(+) from 1 to 5370
COMMENT  pET29b(+)
COMMENT  ApEinfo:methylated:0
FEATURES             Location/Qualifiers
     misc_feature   5076..5750
                     /locus_tag="6xHis_4xGGS_I3-01"
                     /label="6xHis_4xGGS_I3-01"
                     /ApEinfo_label="6xHis_4xGGS_I3-01"
                     /ApEinfo_fwdcolor="cyan"
                     /ApEinfo_revcolor="green"
                     /ApEinfo_graphicformat="arrow_data {{0 1 2 0 0 -1}} {} 0"
                     width 5 offset 0"
     rep_origin     1421..2103
                     /locus_tag="ColE1 origin"
                     /label="ColE1 origin"
                     /ApEinfo_label="ColE1 origin"
                     /ApEinfo_fwdcolor="gray50"
                     /ApEinfo_revcolor="gray50"
                     /ApEinfo_graphicformat="arrow_data {{0 1 2 0 0 -1}} {} 0"
                     width 5 offset 0"
     rep_origin     29..335
                     /locus_tag="F1 ori"
                     /label="F1 ori"
                     /ApEinfo_label="F1 ori"
                     /ApEinfo_fwdcolor="gray50"
                     /ApEinfo_revcolor="gray50"
                     /ApEinfo_graphicformat="arrow_data {{0 1 2 0 0 -1}} {} 0"
                     width 5 offset 0"
     rep_origin     12..467
                     /locus_tag="M13 origin"
                     /label="M13 origin"
                     /ApEinfo_label="M13 origin"
                     /ApEinfo_fwdcolor="gray50"
                     /ApEinfo_revcolor="gray50"
                     /ApEinfo_graphicformat="arrow_data {{0 1 2 0 0 -1}} {} 0"
                     width 5 offset 0"
     misc_binding   5007..5029
                     /locus_tag="LacO"
                     /label="LacO"
                     /ApEinfo_label="LacO"
                     /ApEinfo_fwdcolor="#6495ed"
                     /ApEinfo_revcolor="#6495ed"
                     /ApEinfo_graphicformat="arrow_data {{0 1 2 0 0 -1}} {} 0"
                     width 5 offset 0"
     CDS            complement(3518..4474)
                     /locus_tag="LacI"
                     /label="LacI"
                     /ApEinfo_label="LacI"
                     /ApEinfo_fwdcolor="gray50"
                     /ApEinfo_revcolor="gray50"
```



```

    /ApEinfo_graphicformat="arrow_data {{0 1 2 0 0 -1}} 0}
width 5 offset 0"
CDS    complement(563..1375)
    /locus_tag="KanR"
    /label="KanR"
    /ApEinfo_label="KanR"
    /ApEinfo_fwdcolor="yellow"
    /ApEinfo_revcolor="yellow"
    /ApEinfo_graphicformat="arrow_data {{0 1 2 0 0 -1}} 0}
width 5 offset 0"
misc_feature 5788..5916
    /locus_tag="T7 Terminator"
    /label="T7 Terminator"
    /ApEinfo_label="T7 Terminator"
    /ApEinfo_fwdcolor="#8080ff"
    /ApEinfo_revcolor="#8080ff"
    /ApEinfo_graphicformat="arrow_data {{0 1 2 0 0 -1}} 0}
width 5 offset 0"
misc_feature 4988..5006
    /locus_tag="T7prom"
    /label="T7prom"
    /ApEinfo_label="T7prom"
    /ApEinfo_fwdcolor="#8080ff"
    /ApEinfo_revcolor="#8080ff"
    /ApEinfo_graphicformat="arrow_data {{0 1 2 0 0 -1}} 0}
width 5 offset 0"
misc_feature 5760..5777
    /locus_tag="6xHis Epitope Tag (not translated)"
    /label="6xHis Epitope Tag (not translated)"
    /ApEinfo_label="6xHis Epitope Tag (not translated)"
    /ApEinfo_fwdcolor="#0080c0"
    /ApEinfo_revcolor="green"
    /ApEinfo_graphicformat="arrow_data {{0 1 2 0 0 -1}} 0}
width 5 offset 0"

```

#### ORIGIN

```

1  tggcgaatgg gacgcgccct gtagcggcgc attaacgcgc gcggggtgagg tggttacgcg
61  cagcgtgacc gctacactg ccagcgcctt agcggcccgt ctttcgctt tcttccttc
121 ctttcgccg acgttcgccg gctttccccg tcaagctcta aatcgggggc tcccttagg
181 gttccgatt agtgcttac ggcacctcga ccccaaaaaa cttgattagg gtgatggttc
241 acgtagtggg ccatgcctt gatagacggt ttttcgctt ttgacgttg agtccacgtt
301 ctttaatagt ggactctgt tccaactgg aacaacactc aaccctatct cggctattc
361 tttgattta taagggattt tgccgattc ggcctattg ttaaaaaatg agctgattta
421 acaaaaattt aacgcgaatt taacaaaat attaacgtt acaattcag gtggcacttt
481 tcggggaaat gtgcgcgaa cccctattg tttattttc taaatacatt caaatatgta
541 tccgctcatg aattaattct tagaaaaact catcgagcat caaatgaaac tgcaatttat
601 tcatatcagg attatcaata ccatattttt gaaaaagccg tttctgtaat gaaggagaaa
661 actcaccgag gcagttccat aggatggcaa gatcctgta tcggtctgag attccgactc
721 gtccaacatc aatacaacct attaatctc cctcgtcaaa aataaggta tcaagtgaga
781 aatcaccatg agtgacgact gaatccggtg agaatggcaa aagtttatgc atttcttcc
841 agactgttc aacaggccag ccattacgct cgtcatcaaa atcactgca tcaaccaaac
901 cgttattcat tcgtgattg gcctgagcga gacgaaatac gcgatcgtg ttaaaaggac
961 aattacaaac aggaatcga tgcaaccggc gcaggaacac tgccagcga tcaacaatat
1021 tttcacctga atcaggatat tcttctaata cctggaatgc tgtttcccg gggatcgcag
1081 tggtagtaaa ccatgatca tcaggagtac ggataaaatg cttgatggtc ggaagaggca
1141 taaattccgt cagccagttt agtctgacca tctcatctgt aacatcattg gcaacgctac
1201 ctttgccatg ttcagaaac aactctggcg catcgggctt cccatacaat cgatagattg
1261 tcgcacctga ttgccgaca ttatcgcgag cccattata cccatataaa tcagcatcca
1321 tgttgaatt taatcggcg ctagagcaag acgtttcccg ttgaatatgg ctcataaac

```

1381 cccttgatt actgtttatg taagcagaca gttttattgt tcatgaccaa aatcccttaa  
1441 cgtgagtttt cgttccactg agcgtcagac cccgtagaaa agatcaaagg atcttcttga  
1501 gatccttttt ttctcgcgct aatctgctgc ttgcaaaca aaaaaccacc gctaccagcg  
1561 gtggtttgtt tgccggatca agagctacca actctttttc cgaaggtaac tggcttcagc  
1621 agagcgcaga taccaaatac tgccttcta gtgtagccgt agttaggcca ccaactcaag  
1681 aactctgtag caccgctac atacctcgt ctgctaatcc tgttaccagt ggctgctgcc  
1741 agtggcgata agtcgtgtct taccgggttg gactcaagac gatagtacc ggataaggcg  
1801 cagcggctcg gctgaacggg gggttcgtgc acacagcca gcttgagcg aacgacctac  
1861 accgaactga gatactaca gcgtgagcta tgagaaagcg ccacgctcc cgaagggaga  
1921 aaggcggaca ggtatccggt aagcggcagg gtcggaacag gagagcgac gagggagctt  
1981 ccagggggaa acgctgtga tctttatagt cctgtcgggt ttcgccacct ctgacttgag  
2041 cgtcgatttt tgtgatgctc gtcagggggg cggagcctat ggaaaaacgc cagcaacgcg  
2101 gcctttttac ggttctggc cttttgctgg cttttgctc acatgttctt tctcgtgta  
2161 tcccctgatt ctgtgataa ccgtattacc gcctttgagt gagctgatac cgctcggc  
2221 agccgaacga ccgagcgcag cgagtcatg agcggaggaag cggaagagcg cctgatcggg  
2281 tattttctcc ttacgatct gtgcggtatt tcacaccga tatatggtgc actctcagta  
2341 caatctgctc tgatgccga tagttaagcc agtataact ccgctatcgc tacgtgactg  
2401 ggtcatggct gcgccccgac acccgccaac acccgctgac gcgccccgac gggcttgtct  
2461 gctcccgca tccgcttaca gacaagctgt gaccgtctcc gggagctgca tgtgtcagag  
2521 gttttaccg tcatcaccga aacgcgcgag gcagctcgg taaagctcat cagcgtggtc  
2581 gtgaagcgt tcacagatgt ctgctgttc atccgcgtcc agctcgttga gtttctcag  
2641 aagcgttaa gtctgcttc tgataaagcg ggccatgta agggcggttt tttctgttt  
2701 ggtcactgat gcctcgtgt aagggggatt tctgttcag ggggtaatga taccgatga  
2761 acgagagagg atgctcacga tacgggttac tgatgatga catgccgggt tactggaacg  
2821 ttgtgagggt aaacaactgg cggtatggat gcggcgggac cagagaaaa tcaactcagg  
2881 tcaatgccag cgcttcgta atacagatgt aggtgtcca caggtagacc agcagcatcc  
2941 tgcatgcag atccggaaca taatggtgca gggcgtgac ttccgcttt ccagacttta  
3001 cgaaacacgg aaaccgaaga ccattcatgt tgtgtcag gtcgcagacg ttttcagca  
3061 cgatcgcct cacgttgcct cgcgtatcgg tgattcattc tgtaaccag taaggcaacc  
3121 ccgcccagct agccgggtcc tcaacgacag gagcacgac atgcgcccc gtggggccgc  
3181 catgccggcg ataagccct gcttctgcc gaaacgttg gtggcgggac cagtgcagaa  
3241 ggcttgagcg agggcgtgca agattccgaa taccgcaagc gacagggcca tcatcgtgc  
3301 gctccagcga aagcgttct cgcgaaaat gaccagagc gctccggca cctgtcctac  
3361 gagttgcat ataaagaaga cagtataag tgccgagc atagtcatgc cccgccccca  
3421 ccggaaggag ctgactgggt tgaaggctct caaggcctc ggtcagatc ccggtgccta  
3481 atgagtgagc taactacat taattgcgt cgcgtcactg cccgcttcc agtcgggaaa  
3541 cctgtcgtgc cagctgatt aatgaatcg ccaacgcgcg gggagaggcg gtttgcgtat  
3601 tggcgccag ggtggtttt cttttacca gtgagacggg caacagctga ttgccttca  
3661 ccgctggcc ctgagagagt tgcaagcagc ggtccacgt ggtttgccc agcaggcga  
3721 aatcctgtt gatggtggtt aacggcggga tataacatga gctgtcttc gtatcgtct  
3781 atccactac cgagatgct gcaccaacgc gcagcccga ctggtaatg gcgcgattg  
3841 cgcccagc catctgatc ttggaacca gcatcagc ggaacgatg ccctattca  
3901 gcatttgcatt gttttgtga aaaccggaca tggcactca gtcgcttcc cgttccgta  
3961 tcggctgaat ttgattgcga gtgagatatt tatgccagcc agccagcgc agacgcgcc  
4021 agacagaact taatgggccc gtaaacagc cgatttctg gtgaccaat gcgaccagat  
4081 gctccagcc cagtcgcta ccgttctat gggagaaaat aatactgtt atgggtgtct  
4141 ggtcagagac atcaagaaat aaccccga cattagtga ggcagctcc acagcaatg  
4201 catctgtgc atccagcga tagttaatga tcagcccact gacgcttgc gcgagaagat  
4261 tgtcaccgc cgcttacag gcttcgagc cgcttcttc taccatgac accaccagc  
4321 tggcaccag ttgatcggc cgagattta tcgccgac aatttgcag ggcgctgca  
4381 gggccagact ggaggtggca acgcaatca gcaacgact tttcccgc agttgtgtg  
4441 ccacgcggtt gggaatgta ttcagctcc ccatcggc ttccatttt tcccgcgtt  
4501 tcgagaac gtgctggcc tggttacca cgcgggaaac ggtctgata gagacaccg  
4561 catactcgc gacatctat aacgttact gtttcacatt caccacctg aattgactc  
4621 cttccggcg ctatcatgcc ataccgcaa aggttttgc ccattcagat ggtccggga  
4681 tctcagcct ctccttatg cgactcctg attaggaagc agcccagtag taggttagg  
4741 ccgttgagca ccgcccgc aaggaatggt gcatgcaagg agatggcgcc caacagtccc  
4801 ccggccacgg ggcctgccac cataccacg ccgaaacaag cgctcatgag cccgaagtgg

4861 cgagcccgat cttcccatc ggtgatgtcg gcgatatagg cgccagcaac cgcacctgtg  
4921 gcgcccgtga tgccggccac gatgctccg gcgtagagga tcgagatcga tctcgatccc  
4981 gcgaaattaa tacgactcac tataggggaa ttgtgagcgg ataacaattc ccctctagaa  
5041 ataattttgt ttaactttaa gaaggagata taCATATGCA CCACCACCAC CACCACGGCG  
5101 GCAGCGGCGG CAGCGGCGGT AGCGGCGGTA GCATGAAGAT GGAAGAGCTG TTCAAGAAAC  
5161 ACAAGATCGT TGCCGTGCTG CGTGCCAATA GTGTGGAAGA AGCGAAAAAG AAAGCGCTGG  
5221 CGGTTTTCTT GGGCGGCGTT CATCTGATTG AAATTACCTT TACCGTGCCG GATGCGGATA  
5281 CCGTGATTAA GGAAGTGAAG TTTCTGAAGG AAATGGGCGC GATTATTGGT GCGGGCACCG  
5341 TGACCAGCGT GGAGCAGTGC CGTAAAGCGG TGGAAAGTGG CGCCGAATTC ATTGTGAGTC  
5401 CGCACCTGGA CGAGGAAATT AGCCAATTTT GCAAGGAGAA GGGTGTGTTT TATATGCCAG  
5461 GCGTTATGAC CCCGACCGAA CTGGTGAAG CCATGAAACT GGGCCATACC ATCTTAAAC  
5521 TGTTTCCGGG TGAGGTGGT GGTCCGAGT TTGTTAAAGC GATGAAAGGT CCGTTTCCGA  
5581 ATGTGAAATT TGTGCCAACC GGCGGTGTTA ATCTGGACAA TGTGTGCGAA TGTTCAAAG  
5641 CGGGCGTGCT GGCCGTGGGC GTGGGAGCG CGTTAGTGAA AGGCACCCCG GTGGAAGTGG  
5701 CGGAAAAGGC CAAGGCGTTC GTTGAGAAGA TTCGTGGCTG CACCGAATAA TAGCTCGAGC  
5761 accaccacca ccaccactga gatccggctg ctaacaaagc ccgaaaggaa gctgagttgg  
5821 ctgctgccac cgctgagcaa taactagcat aacccttgg ggcctctaaa cgggtcttga  
5881 ggggtttttt gctgaaagga ggaactatat cgggat

//

>pSL1040\_SpyCage-Flexible\_Expression\_Plasmid

LOCUS pSL1040 6259 bp DNA circular 12-MAY-2022

DEFINITION .

ACCESSION

VERSION

SOURCE .

ORGANISM .

COMMENT pSL0045+I3-01

COMMENT ApEinfo:methylated:0

FEATURES Location/Qualifiers

CDS 5071..5388

/codon\_start=1

/note="SpyCatcher"

/translation="MGSSHHHHHHGSGDSATHIKFSKRDEDGKELAGATMELRDSSGK

T

ISTWISDGQVKDFYLYPGKYTFVETAAPDGYEVATAITFTVNEQGQVTVNGKATKGDA

H

IGSGGSGGSGANKPMQPITSTANKIVWSDPTRLSTTFSASLLRQRVKVGI AELNNVSG

Q

YVSVYKRPAPKPEGCADACVIMPENQSI RTVISGSAENLATLKA EWETHKRNVDTLF

A SGNAGLGLDPTAAIVSSDTTA"

/locus\_tag="SpyCatcher"

/label="SpyCatcher"

/ApEinfo\_label="SpyCatcher"

/ApEinfo\_fwdcolor="pink"

/ApEinfo\_revcolor="pink"

/ApEinfo\_graphicformat="arrow\_data {{0 1 2 0 0 -1}} {} 0"

width 5 offset 0"

primer\_bind 4984..5003

/locus\_tag="T7"

/label="T7"

/ApEinfo\_label="T7"

/ApEinfo\_fwdcolor="cyan"

/ApEinfo\_revcolor="green"

/ApEinfo\_graphicformat="arrow\_data {{0 1 2 0 0 -1}} {} 0"

width 5 offset 0"

CDS 5071..5073

/codon\_start=1

/note="TIR 10295"

/translation="M"

/locus\_tag="TIR 10295"

/label="TIR 10295"

/ApEinfo\_label="TIR 10295"

/ApEinfo\_fwdcolor="pink"

/ApEinfo\_revcolor="pink"

/ApEinfo\_graphicformat="arrow\_data {{0 1 2 0 0 -1}} {} 0"

width 5 offset 0"

rep\_origin 1421..2103

/locus\_tag="Origin of DNA Replication"

/label="Origin of DNA Replication"

/ApEinfo\_label="Origin of DNA Replication"

/ApEinfo\_fwdcolor="gray50"

/ApEinfo\_revcolor="gray50"

/ApEinfo\_graphicformat="arrow\_data {{0 1 2 0 0 -1}} {} 0"

width 5 offset 0"

rep\_origin 12..467

/locus\_tag="M13 origin"

/label="M13 origin"

```

    /ApEinfo_label="M13 origin"
    /ApEinfo_fwdcolor="gray50"
    /ApEinfo_revcolor="gray50"
    /ApEinfo_graphicformat="arrow_data {{0 1 2 0 0 -1}} 0"
    width 5 offset 0"
misc_feature 4984..5002
    /locus_tag="T7prom"
    /label="T7prom"
    /ApEinfo_label="T7prom"
    /ApEinfo_fwdcolor="#8080ff"
    /ApEinfo_revcolor="#8080ff"
    /ApEinfo_graphicformat="arrow_data {{0 1 2 0 0 -1}} 0"
    width 5 offset 0"
CDS 5083..5100
    /codon_start=1
    /product="6xHis"
    /note="6xHis"
    /translation="HHHHHHH"
    /locus_tag="6xHis"
    /label="6xHis"
    /ApEinfo_label="6xHis"
    /ApEinfo_fwdcolor="pink"
    /ApEinfo_revcolor="pink"
    /ApEinfo_graphicformat="arrow_data {{0 1 2 0 0 -1}} 0"
    width 5 offset 0"
rep_origin 29..335
    /locus_tag="F1 ori"
    /label="F1 ori"
    /ApEinfo_label="F1 ori"
    /ApEinfo_fwdcolor="gray50"
    /ApEinfo_revcolor="gray50"
    /ApEinfo_graphicformat="arrow_data {{0 1 2 0 0 -1}} 0"
    width 5 offset 0"
CDS 5386..5388
    /codon_start=1
    /note="3xGSG"
    /translation="GSGGSGGSG"
    /locus_tag="3xGSG"
    /label="3xGSG"
    /ApEinfo_label="3xGSG"
    /ApEinfo_fwdcolor="pink"
    /ApEinfo_revcolor="pink"
    /ApEinfo_graphicformat="arrow_data {{0 1 2 0 0 -1}} 0"
    width 5 offset 0"
CDS complement(563..1375)
    /locus_tag="KanR"
    /label="KanR"
    /ApEinfo_label="KanR"
    /ApEinfo_fwdcolor="yellow"
    /ApEinfo_revcolor="yellow"
    /ApEinfo_graphicformat="arrow_data {{0 1 2 0 0 -1}} 0"
    width 5 offset 0"
misc_feature 6079..6096
    /locus_tag="TEVc Site"
    /label="TEVc Site"
    /ApEinfo_label="TEVc Site"
    /ApEinfo_fwdcolor="#ff0000"
    /ApEinfo_revcolor="green"

```

```

    /ApEinfo_graphicformat="arrow_data {{0 1 2 0 0 -1}} 0}
    width 5 offset 0"
misc_feature 5137..5139
    /note="reactive 255K from CnaB2"
    /locus_tag="reactive 255K from CnaB2"
    /label="reactive 255K from CnaB2"
    /ApEinfo_label="reactive 255K from CnaB2"
    /ApEinfo_fwdcolor="#0080ff"
    /ApEinfo_revcolor="#008200"
    /ApEinfo_graphicformat="arrow_data {{0 1 2 0 0 -1}} 0}
    width 5 offset 0"
misc_binding 5003..5025
    /locus_tag="LacO"
    /label="LacO"
    /ApEinfo_label="LacO"
    /ApEinfo_fwdcolor="#6495ed"
    /ApEinfo_revcolor="#6495ed"
    /ApEinfo_graphicformat="arrow_data {{0 1 2 0 0 -1}} 0}
    width 5 offset 0"
misc_feature complement(3515..4606)
    /locus_tag="lacI"
    /label="lacI"
    /ApEinfo_label="lacI"
    /ApEinfo_fwdcolor="#8080c0"
    /ApEinfo_revcolor="#008200"
    /ApEinfo_graphicformat="arrow_data {{0 1 2 0 0 -1}} 0}
    width 5 offset 0"
misc_feature 5395..6063
    /locus_tag="I3-01"
    /label="I3-01"
    /ApEinfo_label="I3-01"
    /ApEinfo_fwdcolor="cyan"
    /ApEinfo_revcolor="green"
    /ApEinfo_graphicformat="arrow_data {{0 1 2 0 0 -1}} 0}
    width 5 offset 0"
misc_feature 6131..6259
    /locus_tag="T7 Terminator"
    /label="T7 Terminator"
    /ApEinfo_label="T7 Terminator"
    /ApEinfo_fwdcolor="#0000a0"
    /ApEinfo_revcolor="#0000a0"
    /ApEinfo_graphicformat="arrow_data {{0 1 2 0 0 -1}} 0}
    width 5 offset 0"
misc_feature 6103..6120
    /locus_tag="6xHis Epitope Tag"
    /label="6xHis Epitope Tag"
    /ApEinfo_label="6xHis Epitope Tag"
    /ApEinfo_fwdcolor="#0080c0"
    /ApEinfo_revcolor="green"
    /ApEinfo_graphicformat="arrow_data {{0 1 2 0 0 -1}} 0}
    width 5 offset 0"

```

#### ORIGIN

```

1 tggcgaatgg gacgcgccct gtacggcgcg attaagcgcg gcgggtgtgg tggttacgcg
61 cagcgtgacc gctacacttg ccagcgcctt agcgcctcct cctttcgctt tcttccttc
121 ctttctgcc acgttcgccc gctttcccc tcaagctcta aatcgggggc tcccttagg
181 gttccgatt agtgctttac ggcacctga ccccaaaaaa cttgattagg gtgatggttc
241 acgtatggg ccatgcctt gatagacggt ttttcgctt ttgacgttgg agtccacgtt
301 cttaatagt ggactcttgt tccaactgg aacaacactc aaccctatct cggctctattc

```

361 ttttgattta taagggattt tgccgatttc ggcctattgg ttaaaaaatg agctgattta  
421 acaaaaaattt aacgcgaatt ttaacaaaat attaacgttt acaatttcag gtggcacttt  
481 tcggggaaat gtgcgcgaa cccctatttg tttattttc taatacatt caaatatgta  
541 tccgctcatg aattaattct tagaaaaact catcgagcat caaatgaaac tgcaatttat  
601 tcatatcagg attatcaata ccatattttt gaaaaagccg tttctgtaat gaaggagaaa  
661 actcaccgag gcagttccat aggatggcaa gatcctggta tcggtctgcg attccgactc  
721 gtccaacatc aatacaacct attaatttcc cctcgtcaaa aataaggta tcaagtgaga  
781 aatcacatg agtgacgact gaatccgggtg agaatggcaa aagtttatgc atttctttcc  
841 agacttgttc aacaggccag ccattacgct cgatcaaaa atcactcgca tcaaccaaac  
901 cgttattcat tcgtgattgc gcctgagcga gacgaaatac gcatcgctg ttaaaaggac  
961 aattacaac aggaatcgaa tgcaaccggc gcaggaacac tgccagcgca tcaacaatat  
1021 tttcacctga atcaggatat tcttctaata cctggaatgc tgtttcccg gggatcgag  
1081 tggtagtaaa ccatgcatca tcaggagtac ggataaaatg ctgtatggtc ggaagaggca  
1141 taaattccgt cagccagttt agtctgacca tctcatctgt aacatcattg gcaacgctac  
1201 ctttgccatg ttcagaaac aactctggcg catcgggctt ccatataat cगतatgattg  
1261 tcgacactga ttcccagaca ttatcgcgag cccatttata ccatataaa tcagatcca  
1321 tgttggaatt taatcgcggc cttagagcaag acgtttcccg ttgaatatgg ctcataaac  
1381 cccttgattt actgtttatg taagcagaca gttttattgt tcatgacca aatcccttaa  
1441 cgtgagtttt cgttccactg agcgtcagac cccgtagaaa agatcaaagg atcttctga  
1501 gatccttttt tctcgcgct aatctgctgc ttgcaaaaa aaaaaccacc gctaccagcg  
1561 gtggtttgtt tgccggatca agagctacca actcttttc cgaaggtaac tggcttcagc  
1621 agagcgcaga taccaataac tgccttcta gtgtagccgt agttaggcca cacttcaag  
1681 aactctgtag caccgctac atacctgct ctgctaattc tgttaccagt ggctgctgcc  
1741 agtggcgata agtctgtctt taccgggttg gactcaagac gatagttacc ggataaggcg  
1801 cagcggctgg gctgaacggg gggttcgtgc acacagccca gcttgagcg aacgacctac  
1861 accgaaactga gatacctaca gcgtgagcta tgagaaagcg ccacgcttcc cgaagggaga  
1921 aaggcggaca ggtatccggt aagcggcagg gtcggaacag gagagcgac gagggagctt  
1981 ccagggggaa acgctggtta tctttatagt cctgtcgggt ttcgccact ctgacttgag  
2041 cgtcgatttt tgtgatgctc gtcagggggg cggagcctat ggaaaaacgc cagcaacgcg  
2101 gcctttttac ggttctggc cttttgctg cttttgctc acatgttctt tctcgcgta  
2161 tcccctgatt ctgtggataa ccgattacc gcctttgagt gagctgatac cgctcggcg  
2221 agccgaacga ccgagcgag cgagtcagtg agcggagaa cggaagagcg cctgatcgcg  
2281 tattttctcc ttacgcatct gtgcggtatt tcacaccgca tatatgggtc actctcagta  
2341 caatctgctc tgatgccga tagttaagcc agtatacact ccgctatcgc tacgtgactg  
2401 ggtcatggct gcgccccgac acccgccaac acccgctgac gcgcccctgac gggcttgtct  
2461 gctcccggca tccgcttaca gacaagctgt gaccgtctcc gggagctgca tgtgtcagag  
2521 gttttaccg tcataccga aacgcgag gacgctcggg taaagctcat cagcgtggtc  
2581 tgaaagcgt tcacagatgt ctgcctgtt atcccgctcc agctcgttga gtttctcag  
2641 aagcgttaat gtctggcttc tgataaagcg ggccatgta agggcggttt tttctgttt  
2701 ggtcactgat gcctcgtgt aagggggatt tctgttcatg ggggtaatga taccgatgaa  
2761 acgagagagg atgctcaga tacgggttac tgatgatgaa catgccggt tactggaacg  
2821 tttgaggggt aaacaactgg cggtatggat gcggcgggac cagagaaaa tcaactcagg  
2881 tcaatgccag cgcttctgta atacagatgt aggtgttcca caggtagcc agcagcatcc  
2941 tgcatgagc atccggaaca taatggtgca gggcgtgac ttccgcttt ccagacttta  
3001 gaaacacag aaaccaaga ccattcatgt tgttctcag gtcgagacg ttttgagca  
3061 gcagtcgctt cagttcgtct cgcgtatcgg tgattcattc tgtaaccag taaggcaacc  
3121 ccgccagctt agccgggttc tcaacgacag gagcagatc atgcgaccc gtggggcgcg  
3181 catgccggcg ataattgctt gcttctgcc gaaacgtttg gtggcgggac cagtacgaa  
3241 ggcttgagcg agggcgtgca agattccgaa taccgcaagc gacagccga tcatcgtgc  
3301 gctccagcga aagcgttct cggcgaat gaccagagc gctcgggca cctgtctac  
3361 gatttgcatg ataaagaaga cagtataag tgccgagc atagtcatgc cccgcgcca  
3421 ccggaaggag ctgactgggt tgaaggctct caaggcatc ggtcagatc ccggtccta  
3481 atgagtgagc taactacat taattgcgtt gcctcactg cccgcttcc agtcgggaaa  
3541 cctgtcgtc cagctcattt aatgaatcg ccaacgcgc gggagaggcg gtttgcgtat  
3601 tggcgccag ggtgtttttt cttttacca gtgagcggg caacagctga ttgccctca  
3661 ccgctggcc ctgagagagt tgagcaagc ggtccacgct gttttgccc agcaggcgaa  
3721 aatcctgtt gatggtggtt aacggcggga tataacatga gctgtctc gtatcgtct  
3781 atcccactac cgagatatcc gcaccaacgc gcagcccgga ctggtaatg gcgctcattg

3841 cgcccagcgc catctgatcg ttggcaacca gcatcgcagt gggaacgatg ccttcattca  
3901 gcatttgcac ggtttgttga aaaccggaca tggcactcca gtcgcttcc cgttccgcta  
3961 tcggctgaat ttgattgcga gtgagatatt tatgccagcc agccagacgc agacgcgccg  
4021 agacagaact taatgggccc gctaacagcg cgatttgctg gtgaccaat gcgaccagat  
4081 gctccacgcc cagtcgctga ccgtcttcat gggagaaaat aatactgttg atgggtgtct  
4141 ggtcagagac atcaagaaat aacgccggaa cattagtga ggcagcttcc acagcaatgg  
4201 catcctggct atccagcggg tagttaatga tcagcccact gacgcgttgc gcgagaagat  
4261 tgtgcaccgc cgctttagac gcttcgacgc cgcttcgttc taccatcgac accaccacgc  
4321 tggcaccagc ttgatcgcg cgagatttaa tcgcccgac aatttgcgac ggcgctgca  
4381 gggccagact ggaggtggca acgccaatca gcaacgactg tttgccgcc agttgttgg  
4441 ccacgcggtt gggaatgtaa ttcagctccg ccatcgccgc ttcaacttt tccgcgtt  
4501 tcgcagaaac ttggctggcc tggttacca cgcgggaaac ggtctgataa gagacaccgg  
4561 catactctgc gacatcgat aacgttactg gtttcacatt caccaccctg aattgactct  
4621 cttccggcgc ctatcatgcc ataccgcaa aggttttgcg ccattcgatg gtgtccggga  
4681 tctcgacgct ctccctatg cgactcctgc attaggaagc agccagtag taggtgagg  
4741 ccgttgagca ccgcccgcc aaggaatggt gcatgcaagg agatggcgcc caacagtccc  
4801 ccggccacgg ggctgccac cataccacg ccgaacaag cgctcatgag cccgaagtgg  
4861 cgagcccgat ctccccatc ggtgatgtcg gcgatatagg cgccagcaac cgcacctgtg  
4921 gcgcccgtga tgcggccac gatgcgtccg gcgtagagga tcgagatctc gatcccgcga  
4981 aattaatag actcactata ggggaattgt gagcggataa caattcccct ctagaataa  
5041 tttgttttaa cttaagaag gagatatacc atggGCAGCA GCCATCATCA TCATCATCAC  
5101 GGCAGCGCG ATAGTGCTAC CCATATTTAA TTCTCAAAC GTGATGAGGA CGGCAAAGAG  
5161 TTAGCTGGTG CAACTATGGA GTTGCGTGAT TCATCTGGTA AACTATTAG TACATGGATT  
5221 TCAGATGGAC AAGTGAAAGA TTTCTACCTG TATCCAGGAA AATATACATT TGTCGAAACC  
5281 GCAGCACCAG ACGGTTATGA GGTAGCAACT GCTATTACCT TTACAGTTAA TGAGCAAGGT  
5341 CAGGTTACTG TAAACGGCAA AGCAACTAAA GGTGACGCTC ATATTGGCgt cgacCACCAC  
5401 CACCACCACC ACGGCGGCAG CGGCGGCAGC GCGGTAGCG GCGGTAGCAT GAAGATGGAA  
5461 GAGCTGTTCA AGAAACACAA GATCGTTGCC GTGCTGCGTG CCAATAGTGT GGAAGAAGCG  
5521 AAAAAAGAAAG CGTGCGCGGT TTTCTGGGC GCGGTTATC TGATTGAAAT TACCTTACC  
5581 GTGCCGGATG CGGATACCGT GATTAAGGAA CTGAGCTTTC TGAAGGAAAT GGGCGCGATT  
5641 ATTGGTGCGG GCACCGTGAC CAGCGTGAG CAGTGCCGTA AAGCGGTGGA AAGTGGCGCC  
5701 GAATTCATTG TGAGTCCGCA CCTGGACGAG GAAATTAGCC AATTTTGCA GGAGAAGGGT  
5761 GTGTTCTATA TGCCAGGCGT TATGACCCG ACCGAACTGG TGAAAGCCAT GAACTGGGC  
5821 CATACCATCT TAAACTGTT TCCGGGTGAG GTGGTGGGTC CGCAGTTTGT TAAAGCGATG  
5881 AAAGTCCGT TTCCGAATGT GAAATTTGT CCAACCGCG GTGTTAATCT GGACAATGTG  
5941 TGCGAATGGT TCAAAGCGGG CGTGCTGGCC GTGGGCGTGG GCAGCGCGTT AGTGAAAGGC  
6001 ACCCCGGTGG AAGTGGCGGA AAAGGCCAAG GCGTTCGTTG AGAAGATTCC TGGCTGCACC  
6061 GAAcatatgt agctcgagAA CCTGTACTTC CAGGGAgctg agcaccacca ccaccaccac  
6121 tgagatccg ctgctaaca agcccgaag gaagctgagt tggctgctgc caccgctgag  
6181 caataactag cataaccct tgggcctct aaacgggtct tgaggggtt tttgctgaa  
6241 ggaggaacta tatccggat

//



>pSL1510\_SARS-CoV-2-Spike-RBD-NoSpyTag\_Expression Plasmid  
LOCUS pSL1510 5498 bp DNA circular 12-MAY-2022

DEFINITION .

ACCESSION

VERSION

SOURCE .

ORGANISM .

COMMENT

COMMENT

COMMENT ApEinfo:methylated:1

FEATURES Location/Qualifiers

rep\_origin complement(3730..4412)  
/locus\_tag="ColE1 origin"  
/label="ColE1 origin"  
/ApEinfo\_label="ColE1 origin"  
/ApEinfo\_fwdcolor="gray50"  
/ApEinfo\_revcolor="gray50"  
/ApEinfo\_graphicformat="arrow\_data {{0 1 2 0 0 -1}} {} 0}  
width 5 offset 0"

misc\_binding complement(3023..3045)  
/locus\_tag="LacO"  
/label="LacO"  
/ApEinfo\_label="LacO"  
/ApEinfo\_fwdcolor="#6495ed"  
/ApEinfo\_revcolor="#6495ed"  
/ApEinfo\_graphicformat="arrow\_data {{0 1 2 0 0 -1}} {} 0}  
width 5 offset 0"

misc\_feature 3375..3505  
/locus\_tag="SV40 early poly-A signal"  
/label="SV40 early poly-A signal"  
/ApEinfo\_label="SV40 early poly-A signal"  
/ApEinfo\_fwdcolor="#808000"  
/ApEinfo\_revcolor="green"  
/ApEinfo\_graphicformat="arrow\_data {{0 1 2 0 0 -1}} {} 0}  
width 5 offset 0"

misc\_feature complement(4510..5169)  
/locus\_tag="AmpR"  
/label="AmpR"  
/ApEinfo\_label="AmpR"  
/ApEinfo\_fwdcolor="ffff00"  
/ApEinfo\_revcolor="ffff00"  
/ApEinfo\_graphicformat="arrow\_data {{0 1 2 0 0 -1}} {} 0}  
width 5 offset 0"

misc\_feature 3185..3364  
/locus\_tag="SV40 Promoter"  
/label="SV40 Promoter"  
/ApEinfo\_label="SV40 Promoter"  
/ApEinfo\_fwdcolor="#8080c0"  
/ApEinfo\_revcolor="green"  
/ApEinfo\_graphicformat="arrow\_data {{0 1 2 0 0 -1}} {} 0}  
width 5 offset 0"

misc\_feature complement(776..781)  
/locus\_tag="Ribosome Binding Site"  
/label="Ribosome Binding Site"  
/ApEinfo\_label="Ribosome Binding Site"  
/ApEinfo\_fwdcolor="cyan"  
/ApEinfo\_revcolor="green"  
/ApEinfo\_graphicformat="arrow\_data {{0 1 2 0 0 -1}} {} 0}

```

width 5 offset 0"
misc_feature complement(2918..2923)
  /locus_tag="Ribosome Binding Site(1)"
  /label="Ribosome Binding Site(1)"
  /ApEinfo_label="Ribosome Binding Site"
  /ApEinfo_fwdcolor="cyan"
  /ApEinfo_revcolor="green"
  /ApEinfo_graphicformat="arrow_data {{0 1 2 0 0 -1}} 0"
width 5 offset 0"
misc_feature complement(3869..3874)
  /locus_tag="Ribosome Binding Site(2)"
  /label="Ribosome Binding Site(2)"
  /ApEinfo_label="Ribosome Binding Site"
  /ApEinfo_fwdcolor="cyan"
  /ApEinfo_revcolor="green"
  /ApEinfo_graphicformat="arrow_data {{0 1 2 0 0 -1}} 0"
width 5 offset 0"
misc_feature complement(3023..3040)
  /locus_tag="Minimal LacO"
  /label="Minimal LacO"
  /ApEinfo_label="Minimal LacO"
  /ApEinfo_fwdcolor="#ff80c0"
  /ApEinfo_revcolor="green"
  /ApEinfo_graphicformat="arrow_data {{0 1 2 0 0 -1}} 0"
width 5 offset 0"
misc_feature 84..371
  /locus_tag="CAG Enhancer / CMV immediate early promoter"
  /label="CAG Enhancer / CMV immediate early promoter"
  /ApEinfo_label="CAG Enhancer / CMV immediate early promoter"
  /ApEinfo_fwdcolor="#8080c0"
  /ApEinfo_revcolor="green"
  /ApEinfo_graphicformat="arrow_data {{0 1 2 0 0 -1}} 0"
width 5 offset 0"
misc_feature 2517..2955
  /locus_tag="rb glob PA terminator"
  /label="rb glob PA terminator"
  /ApEinfo_label="rb glob PA terminator"
  /ApEinfo_fwdcolor="#800000"
  /ApEinfo_revcolor="green"
  /ApEinfo_graphicformat="arrow_data {{0 1 2 0 0 -1}} 0"
width 5 offset 0"
misc_feature 1734..2465
  /locus_tag="SARS-CoV-2 Spike SP+RBD+6xHis"
  /label="SARS-CoV-2 Spike SP+RBD+6xHis"
  /ApEinfo_label="SARS-CoV-2 Spike SP+RBD+6xHis"
  /ApEinfo_fwdcolor="cyan"
  /ApEinfo_revcolor="green"
  /ApEinfo_graphicformat="arrow_data {{0 1 2 0 0 -1}} 0"
width 5 offset 0"
misc_feature 385..1630
  /locus_tag="CAG promoter"
  /label="CAG promoter"
  /ApEinfo_label="CAG promoter"
  /ApEinfo_fwdcolor="#0080c0"
  /ApEinfo_revcolor="green"
  /ApEinfo_graphicformat="arrow_data {{0 1 2 0 0 -1}} 0"
width 5 offset 0"

```

ORIGIN

1 GTCGACATTG ATTATTGACT AGTTATTAAT AGTAATCAAT TACGGGGTCA TTAGTTCATA  
61 GCCCATATAT GGAGTTCGCG GTTACATAAC TTACGGTAAA TGGCCCGCCT GGCTGACCGC  
121 CCAACGACCC CCGCCATTG ACGTCAATAA TGACGTATGT TCCCATAGTA ACGCCAATAG  
181 GGACTTTCCA TTGACGTCAA TGGGTGGAGT ATTTACGGTA AACTGCCAC TTGGCAGTAC  
241 ATCAAGTGTG TCATATGCCA AGTACGCCCC CTATTGACGT CAATGACGGT AAATGGCCCC  
301 CCTGGCATTG TGCCAGTAC ATGACCTTAT GGGACTTTCC TACTTGCCAG TACATCTACG  
361 TATTAGTCAT CGCTATTACC ATGGTCGAGG TGAGCCCCAC GTTCTGCTTC ACTCTCCCA  
421 TCTCCCCCCC CTCCCCACCC CCAATTTTGT ATTTATTTAT TTTTAATTA TTTTGTGCAG  
481 CGATGGGGGC GGGGGGGGGG GGGGCGCGC CCAGGCGGGG CGGGGCGGGG CGAGGGGCGG  
541 GCGGGGGCGA GCGGAGAGG TGCGGCGGCA GCCAATCAGA GCGGCGCGCT CCGAAAGTTT  
601 CCTTTTATGG CGAGGCGGCG GCGGCGGCG CCCTATAAAA AGCGAAGCGC GCGGCGGGCG  
661 GGAGTCGCTG CGCGCGCTGC CTTGCCCCG TGCCCCGCTC CGCGCCGCTC CGCGCCGCC  
721 GCCCGGCTC TGA CTGACCG CGTACTCCC ACAGGTGAGC GGGCGGGACG GCCCTTCTCC  
781 TCCGGGCTGT AATTAGCGCT TGGTTAATG ACGGCTTGT TCTTTTCTGT GGCTGCGTGA  
841 AAGCCTTGAG GGGCTCCGGG AGGGCCCTTT GTGCGGGGGG GAGCGGCTCG GGGGTGCGT  
901 GCGTGTGTGT GTGCGTGGGG AGCGCCGCGT GCGGCTCCGC GCTGCCGCGC GGCTGTGAGC  
961 GCTGCGGGCG CGCGCGGGG CTTTGTGCGC TCCGAGTGT GCGGAGGGG AGCGCGGCCG  
1021 GGGGCGGTGC CCCGCGGTGC GGGGGGGGCT GCGAGGGGAA CAAAGGCTGC GTGCGGGGTG  
1081 TGTGCGTGGG GGGGTGAGCA GGGGTGTGG GCGGTCGGT CGGGCTGCA CCCCCCTG  
1141 CCCCCCTC CCCGAGTTC TGAGCACGGC CCGCTTCGG GTGCGGGGCT CCGTACGGGG  
1201 CGTGCGCGG GGCTCGCGT GCCGGGCGG GGGTGGCGC AGGTGGGGT GCCGGGCGGG  
1261 GCGGGGCCG CTCGGGCCG GGAGGGCTC GGGGAGGGG GCGGCGGCC CCGAGCGCC  
1321 GCGGCTGTC GAGGCGCGC GAGCCGAGC CATTGCCTTT TATGGTAATC GTGCGAGAGG  
1381 GCGCAGGGAC TTCCTTGTG CCAAATCTG CGGAGCCGAA ATCTGGGAGG CGCCCGCA  
1441 CCCCTCTAG CGGGCGCGG GCGAAGCGGT GCGGCGCGG CAGGAAGGAA ATGGGCGGG  
1501 AGGCCTTCG TGCCTGCGG CGCCGCGTC CCCTTCTCC TCTCCAGCT CGGGGCTGCC  
1561 GCGGGGGGAC GGCTGCCTC GGGGGGGACG GGGCAGGGG GGGTTCGCT TCTGGCGTGT  
1621 GACCGCGGC TCTAGAGCT CTGCTAACCA TGTTATGCC TTCTTTTT TCCTACAGT  
1681 CCTGGGCAAC GTGCTGGTTA TTGTGCTGTC TCATCATTTT GGCAAAGGCC ACCATGTTG  
1741 TGTTTCTGTT GCTGCTGCT CTGGTGTCCA GCCAGCGGGT GCAGCCACC GAATCCATG  
1801 TGCGGTTCCC CAATATCACC AATCTGTGCC CCTTCGGCGA GGTGTTCAAT GCCACCAGT  
1861 TCGCCTCTGT GTACGCTGG AACCGAAGC GGATCAGCAA TTGCGTGGCC GACTACTCCG  
1921 TGCTGTACAA CTCCGCCAGC TTCAGCACCT TCAAGTGCTA CGGCGTGTCC CCTACCAAGC  
1981 TGAACGACCT GTGCTTACA AACGTGTACG CCGACAGCTT CGTGATCCGG GGAGATGAAG  
2041 TGCGGCAGAT TGCCCCTGGA CAGACAGGCA AGATCGCCA CTACAACTAC AAGCTGCCCG  
2101 ACGACTTAC CGGCTGTGT ATTGCCGGA ACAGCAACA CCTGGACTCC AAAGTGGCG  
2161 GCAACTACAA TTACTGTAC CGGCTGTTCC GGAAGTCAA TCTGAAGCCC TTCGAGCGGG  
2221 ACATCTCCAC CGAGATCTAT CAGGCCGCA GCACCCCTG TAACGGCGTG GAAGGCTTCA  
2281 ACTGCTACTT CCCACTGCAG TCCTACGGCT TTCAGCCAC AAATGGCGTG GGCTATCAGC  
2341 CCTACAGAGT GGTGGTGCTG AGCTTCGAAC TGCTGCATGC CCCTGCCACA GTGTGCGGCC  
2401 CTAAGAAAAG CACCAATCTC GTGAAGAACA AATGCGTGAA CTCCACCAT CACCATCACC  
2461 ATTGATAAAA TTCGAGCTCG CGGCCGATC GATCTTAAGT CGCGACTCGA GCTAGCAGT  
2521 CTTTTTCCCT CTGCCAAAAA TTATGGGGAC ATCATGAAGC CCCTTGAGCA TCTGACTTCT  
2581 GGTAATAAAA GAAAATTTAT TTTTATTGCA ATAGTGTGTT GGAATTTTTT GTGTCTCTCA  
2641 CTCGGAAGGA CATATGGGAG GGCAAATCAT TAAAACATC AGAATGAGTA TTTGGTTTAG  
2701 AGTTTGGCAA CATATGCCA TATGCTGGCT GCCATGAACA AAGGTTGGCT ATAAAGAGGT  
2761 CATCAGTATA TGAAACAGCC CCCTGCTGTC CATTCTTAT TCCATAGAAA AGCCTTACT  
2821 TGAGGTTAGA TTTTTTTTAT ATTTTGTGTT GTGTTATTTT TTTCTTAAAC ATCCCTAAAA  
2881 TTTTCTTAC ATGTTTTACT AGCCAGATTT TTCTCTCTCT CTGACTACT CCCAGTCATA  
2941 GCTGTCCCTC TTCTTTATG GAGATCCCTC GACCTGCAGC CCAAGCTTGG CGTAATCATG  
3001 GTCATAGCTG TTTCTGTGT GAAATTGTTA TCCGCTACA ATTCCACACA ACATACGAGC  
3061 CGGAAGCATA AAGTGTAAG CCTGGGGTGC CTAATGAGTG AGCTAACTCA CATTAAATTG  
3121 GTTGCCTCA CTGCCGCTT TCCAGTCGGG AAACCTGTCG TGCCAGCGGA TCCGATCTC  
3181 AATTAGTCAG CAACCATAGT CCCGCCCTA ACTCCGCCA TCCGCCCCT AACTCCGCC  
3241 AGTTCGCCC ATTCTCGCC CCATGGCTGA CTAATTTTTT TTATTTATGC AGAGCCGAG  
3301 GCCGCTCGG CCTCTGAGCT ATTCCAGAAG TAGTGAGGAG GCTTTTTTGG AGGCCTAGGC  
3361 TTTTGCAAAA AGCTAACTTG TTTATTGCAG CTTATAATGG TTACAAATAA AGCAATAGCA

3421 TCACAAATTT CACAAATAAA GCATTTTTTT CACTGCATTC TAGTTGTGGT TTGTCAAAC  
3481 TCATCAATGT ATCTTATCAT GTCTGGATCC GCTGCATTAA TGAATCGGCC AACGCGCGGG  
3541 GAGAGGCGGT TTGCGTATTG GGCCTCTTC CGCTTCCTCG CTCACTGACT CGCTGCGCTC  
3601 GGTCGTTCCG CTGCGGCGAG CGGTATCAGC TCACTCAAAG GCGGTAATAC GGTTATCCAC  
3661 AGAATCAGGG GATAACGCAG GAAAGAACAT GTGAGCAAAA GGCCAGCAAA AGGCCAGGAA  
3721 CCGTAAAAAG GCCGCGTTGC TGGCGTTTTT CCATAGGCTC CGCCCCCTG ACGAGCATCA  
3781 CAAAAATCGA CGCTCAAGTC AGAGGTGGCG AAACCCGACA GGACTATAAA GATACCAGGC  
3841 GTTTCCCCCT GGAAGCTCCC TCGTGCGCTC TCCTGTTCCG ACCCTGCCGC TTACCGGATA  
3901 CCTGTCCGCC TTTCTCCCTT CGGGAAGCGT GGCCTTTCT CATAGCTCAC GCTGTAGGTA  
3961 TCTCAGTTCG GTGTAGGTCG TTCGCTCAA GCTGGGCTGT GTGCACGAAC CCCCCGTTCA  
4021 GCCCGACCGC TGCGCCTTAT CCGGTAACTA TCGTCTTGAG TCCAACCCGG TAAGACACGA  
4081 CTTATCGCCA CTGGCAGCAG CCACTGGTAA CAGGATTAGC AGAGCGAGGT ATGTAGGCGG  
4141 TGCTACAGAG TTCTTGAAGT GGTGGCCTAA CTACGGCTAC ACTAGAAGAA CAGTATTTGG  
4201 TATCTGCGCT CTGCTGAAGC CAGTTACCTT CGGAAAAAGA GTTGGTAGCT CTTGATCCGG  
4261 CAAACAAACC ACCGCTGGTA GCGGTGGTTT TTTTGTTCG AAGCAGCAGA TTACGCGCAG  
4321 AAAAAAAGGA TCTCAAGAAG ATCCTTTGAT CTTTTCTACG GGGTCTGACG CTCAGTGAA  
4381 CGAAAACTCA CGTTAAGGGA TTTTGGTCAT GAGATTATCA AAAAGGATCT TCACCTAGAT  
4441 CCTTTTAAAT TAAAAATGAA GTTTTAAATC AATCTAAAGT ATATATGAGT AAACCTGGTC  
4501 TGACAGTTAC CAATGCTTAA TCAGTGAGGC ACCTATCTCA GCGATCTGTC TATTTGTTT  
4561 ATCCATAGTT GCCTGACTCC CCGTCGTGTA GATAACTACG ATACGGGAGG GCTTACCATC  
4621 TGGCCCCAGT GCTGCAATGA TACCGCGAGA CCCACGCTCA CCGGCTCCAG ATTTATCAGC  
4681 AATAAACCCAG CCAGCCGGAA GGGCCGAGCG CAGAAGTGGT CCTGCAACTT TATCCGCCTC  
4741 CATCCAGTCT ATTAATTGTT GCCGGGAAGC TAGAGTAAGT AGTTCGCCAG TTAATAGTTT  
4801 GCGCAACGTT GTTGCCATTG CTACAGGCAT CGTGGTGTCA CGCTCGTCGT TTGGTATGGC  
4861 TTCATTACG TCCGGTTCCC AACGATCAAG GCGAGTTACA TGATCCCCA TGTTGTGCAA  
4921 AAAAGCGGTT AGCTCCTTCG GTCCTCCGAT CGTTGTCAGA AGTAAGTTGG CCGCAGTGTT  
4981 ATCACTCATG GTTATGGCAG CACTGCATAA TTCTTACT GTCATGCCAT CCGTAAGATG  
5041 CTTTTCTGTG ACTGGTGAGT ACTCAACCAA GTCATTCTGA GAATAGTGTA TGCGGCGACC  
5101 GAGTTGCTCT TGCCCCGCGT CAATACGGGA TAATACCGCG CCACATAGCA GAACTTTAAA  
5161 AGTGCTCATC ATTGGAAAAC GTTCTTCGGG GCGAAAACTC TCAAGGATCT TACCGCTGTT  
5221 GAGATCCAGT TCGATGTAAC CCACTCGTGC ACCCACTGA TCTTCAGCAT CTTTTACTTT  
5281 CACCAGCGTT TCTGGGTGAG CAAAAACAGG AAGGCAAAAT GCCGCAAAA AGGGAATAAG  
5341 GCGGACACGG AAATGTTGAA TACTCATACT CTTCTTTTT CAATATTATT GAAGCATTTA  
5401 TCAGGGTTAT TGTCTCATGA GCGGATACAT ATTTGAATGT ATTTAGAAAA ATAAACAAAT  
5461 AGGGGTTCCG CGCACATTC CCCGAAAAGT GCCACCTG

//

```

>pSL1515_SARS-CoV-2-Spike-RBD-WithSpyTag_Expression Plasmid
LOCUS   pSL1515           5512 bp DNA    circular 12-MAY-2022
DEFINITION .
ACCESSION
VERSION
SOURCE .
ORGANISM .
COMMENT
COMMENT  ApEinfo:methylated:1
FEATURES             Location/Qualifiers
     primer_bind    complement(3011..3031)
                     /locus_tag="M13-rev"
                     /label="M13-rev"
                     /ApEinfo_label="M13-rev"
                     /ApEinfo_fwdcolor="cyan"
                     /ApEinfo_revcolor="green"
                     /ApEinfo_graphicformat="arrow_data {{0 1 2 0 0 -1}} {} 0"
                     width 5 offset 0"
     misc_feature   1898..2462
                     /locus_tag="SARS-CoV-2 Spike SP+RBD+6xHis"
                     /label="SARS-CoV-2 Spike SP+RBD+6xHis"
                     /ApEinfo_label="SARS-CoV-2 Spike SP+RBD+6xHis"
                     /ApEinfo_fwdcolor="cyan"
                     /ApEinfo_revcolor="green"
                     /ApEinfo_graphicformat="arrow_data {{0 1 2 0 0 -1}} {} 0"
                     width 5 offset 0"
     rep_origin     complement(3744..4426)
                     /locus_tag="ColE1 origin"
                     /label="ColE1 origin"
                     /ApEinfo_label="ColE1 origin"
                     /ApEinfo_fwdcolor="gray50"
                     /ApEinfo_revcolor="gray50"
                     /ApEinfo_graphicformat="arrow_data {{0 1 2 0 0 -1}} {} 0"
                     width 5 offset 0"
     misc_binding   complement(3037..3059)
                     /locus_tag="LacO"
                     /label="LacO"
                     /ApEinfo_label="LacO"
                     /ApEinfo_fwdcolor="#6495ed"
                     /ApEinfo_revcolor="#6495ed"
                     /ApEinfo_graphicformat="arrow_data {{0 1 2 0 0 -1}} {} 0"
                     width 5 offset 0"
     misc_feature   3389..3519
                     /locus_tag="SV40 early poly-A signal"
                     /label="SV40 early poly-A signal"
                     /ApEinfo_label="SV40 early poly-A signal"
                     /ApEinfo_fwdcolor="#808000"
                     /ApEinfo_revcolor="green"
                     /ApEinfo_graphicformat="arrow_data {{0 1 2 0 0 -1}} {} 0"
                     width 5 offset 0"
     misc_feature   complement(4524..5183)
                     /locus_tag="AmpR"
                     /label="AmpR"
                     /ApEinfo_label="AmpR"
                     /ApEinfo_fwdcolor="ffff00"
                     /ApEinfo_revcolor="ffff00"
                     /ApEinfo_graphicformat="arrow_data {{0 1 2 0 0 -1}} {} 0"
                     width 5 offset 0"

```

```

misc_feature 3199..3378
  /locus_tag="SV40 Promoter"
  /label="SV40 Promoter"
  /ApEinfo_label="SV40 Promoter"
  /ApEinfo_fwdcolor="#8080c0"
  /ApEinfo_revcolor="green"
  /ApEinfo_graphicformat="arrow_data {{0 1 2 0 0 -1}} 0"
  width 5 offset 0"
misc_feature complement(776..781)
  /locus_tag="Ribosome Binding Site"
  /label="Ribosome Binding Site"
  /ApEinfo_label="Ribosome Binding Site"
  /ApEinfo_fwdcolor="cyan"
  /ApEinfo_revcolor="green"
  /ApEinfo_graphicformat="arrow_data {{0 1 2 0 0 -1}} 0"
  width 5 offset 0"
misc_feature complement(2932..2937)
  /locus_tag="Ribosome Binding Site(1)"
  /label="Ribosome Binding Site(1)"
  /ApEinfo_label="Ribosome Binding Site"
  /ApEinfo_fwdcolor="cyan"
  /ApEinfo_revcolor="green"
  /ApEinfo_graphicformat="arrow_data {{0 1 2 0 0 -1}} 0"
  width 5 offset 0"
misc_feature complement(3883..3888)
  /locus_tag="Ribosome Binding Site(2)"
  /label="Ribosome Binding Site(2)"
  /ApEinfo_label="Ribosome Binding Site"
  /ApEinfo_fwdcolor="cyan"
  /ApEinfo_revcolor="green"
  /ApEinfo_graphicformat="arrow_data {{0 1 2 0 0 -1}} 0"
  width 5 offset 0"
misc_feature complement(3037..3054)
  /locus_tag="Minimal LacO"
  /label="Minimal LacO"
  /ApEinfo_label="Minimal LacO"
  /ApEinfo_fwdcolor="#ff80c0"
  /ApEinfo_revcolor="green"
  /ApEinfo_graphicformat="arrow_data {{0 1 2 0 0 -1}} 0"
  width 5 offset 0"
misc_feature 84..371
  /locus_tag="CAG Enhancer / CMV immediate early promoter"
  /label="CAG Enhancer / CMV immediate early promoter"
  /ApEinfo_label="CAG Enhancer / CMV immediate early promoter"
  /ApEinfo_fwdcolor="#8080c0"
  /ApEinfo_revcolor="green"
  /ApEinfo_graphicformat="arrow_data {{0 1 2 0 0 -1}} 0"
  width 5 offset 0"
misc_feature 2531..2969
  /locus_tag="rb glob PA terminator"
  /label="rb glob PA terminator"
  /ApEinfo_label="rb glob PA terminator"
  /ApEinfo_fwdcolor="#800000"
  /ApEinfo_revcolor="green"
  /ApEinfo_graphicformat="arrow_data {{0 1 2 0 0 -1}} 0"
  width 5 offset 0"
misc_feature 1734..1897

```

```
/locus_tag="SARS-CoV-2 Spike SP+RBD+6xHis(1)"
/label="SARS-CoV-2 Spike SP+RBD+6xHis(1)"
/ApEinfo_label="SARS-CoV-2 Spike SP+RBD+6xHis"
/ApEinfo_fwdcolor="cyan"
/ApEinfo_revcolor="green"
/ApEinfo_graphicformat="arrow_data {{0 1 2 0 0 -1}} 0}
width 5 offset 0"
```

misc\_feature 385..1630

```
/locus_tag="CAG promoter"
/label="CAG promoter"
/ApEinfo_label="CAG promoter"
/ApEinfo_fwdcolor="#0080c0"
/ApEinfo_revcolor="green"
/ApEinfo_graphicformat="arrow_data {{0 1 2 0 0 -1}} 0}
width 5 offset 0"
```

## ORIGIN

```
1 GTCGACATTG ATTATTGACT AGTTATTAAT AGTAATCAAT TACGGGGTCA TTAGTTCATA
61 GCCCATATAT GGAGTTCGCG GTTACATAAC TTACGGTAAA TGGCCCGCCT GGCTGACCGC
121 CCAACGACCC CCGCCATTG ACGTCAATAA TGACGTATGT TCCCATAGTA ACGCCAATAG
181 GGACTTTCCA TTGACGTCAA TGGGTGGAGT ATTTACGGTA AACTGCCAC TTGGCAGTAC
241 ATCAAGTGTA TCATATGCCA AGTACGCCCC CTATTGACGT CAATGACGGT AAATGGCCCC
301 CCTGGCATTG TGCCAGTAC ATGACCTTAT GGGACTTTCC TACTTGGCAG TACATCTACG
361 TATTAGTCAT CGCTATTACC ATGGTCGAGG TGAGCCCCAC GTTCTGCTC ACTCTCCCA
421 TCTCCCCCCC CTCCCCACC CCAATTTTGT ATTTATTTAT TTTTAATTA TTTTGTGCAG
481 CGATGGGGGC GGGGGGGGGG GGGGCGCGC CCAGGCGGGG CGGGGCGGGG CGAGGGGGCG
541 GCGGGGGCGA GCGGAGAGG TGCGGCGGCA GCCAATCAGA GCGGCGCGCT CCGAAAGTTT
601 CCTTTTATGG CGAGGCGGCG GCGGCGGCGG CCCTATAAAA AGCGAAGCGC GCGGCGGGCG
661 GGAGTCGCTG CGCGCGCTGC CTTCGCCCCG TGCCCCGCTC CGCGCCGCTC CGCGCCGCC
721 GCCCCGGCTC TACTGACCG CGTACTCCC ACAGGTGAGC GGGCGGGGACG GCCCTTCTCC
781 TCCGGGCTGT AATTAGCGCT TGGTTAATG ACGGCTTGT TCTTTTCTGT GGCTGCGTGA
841 AAGCCTTGTG GGGCTCCGGG AGGGCCCTTT GTGCGGGGGG GAGCGGCTCG GGGGGTGCCT
901 GCGTGTGTGT GTGCGTGGGG AGCGCCGCGT GCGGCTCCGC GCTGCCCGGC GGCTGTGAGC
961 GCTGCGGGCG GGGCGGGGG CTTTGTGCGC TCCGAGTGT GCGCGAGGGG AGCGCGGCCG
1021 GGGGCGGTGC CCCGCGGTGC GGGGGGGGCT GCGAGGGGAA CAAAGGCTGC GTGCGGGGGT
1081 TGTGCGTGGG GGGGTGAGCA GGGGGTGTGG GCGCGTCGGT CGGGCTGCAA CCCCCCTG
1141 CACCCCTCTC CCGAGTTGC TGAGCACGGC CCGGCTTCGG GTGCGGGGCT CCGTACGGGG
1201 CGTGGCGCGG GGCTCGCCGT GCCGGGCGGG GGGTGGCGGC AGGTGGGGGT GCCGGGCGGG
1261 GCGGGGCGCG CTCGGGCCGG GGAGGGCTCG GGGGAGGGG GCGGCGGCC CCGGAGCGCC
1321 GCGGCTGTC GAGGCGCGGC GAGCCGAGC CATTGCCTTT TATGGTAATC GTGCGAGAGG
1381 GCGCAGGGAC TTCTTTGTC CAAATCTGG CGGAGCCGAA ATCTGGGAGG CGCCCGCGCA
1441 CCCCCTCTAG CGGGCGCGGG GCGAAGCGGT GCGGCGCCGG CAGGAAGGAA ATGGGCGGGG
1501 AGGGCCTTCG TGCGTCGCCG CGCCGCCGTC CCCTTCTCC TCTCCAGCCT CGGGGCTGCC
1561 GCGGGGGGAC GGCTGCCTC GGGGGGGGAC GGGCAGGGCG GGGTTCGGCT TCTGGCGTGT
1621 GACCGGCGGC TCTAGAGCCT CTGCTAACCA TGTTATGCC TTCTTCTTT TCCTACAGCT
1681 CCTGGGCAAC GTGCTGTTA TTGTGCTGTC TCATCATTTT GGCAAAGGCC ACCATGTTCC
1741 TGTTTCTGGT GCTGCTGCCT CTGGTGTCCA GCCAGCGGGT GCAGCCACC GAATCCATCG
1801 TGCGTTTCCC CAATATCACC AATCTGTGCC CCTTCGGCGA GGTGTTCAAT GCCACCAGAT
1861 TCGCTCTGT GTACGCTGG AACCGAAGC GGATCAGCAA TTGCGTGCC GACTACTCCG
1921 TGCTGTACAA CTCCGCCAGC TTCAGCACCT TCAAGTGCTA CGGCGTGTCC CCTACCAAGC
1981 TGAACGACCT GTGCTTACA AACGTGTACG CCGACAGCTT CGTGATCCGG GGAGATGAAG
2041 TGCGGCAGAT TGCCCTGGA CAGACAGGCA AGATCGCCGA CTACAACCTAC AAGTGGCCG
2101 ACGACTTAC CGGCTGTGTG ATTGCTGGA ACAGCAACA CCTGGACTCC AAAGTCGGCG
2161 GCAACTACAA TTACCTGTAC CGGCTGTTCC GGAAGTCAA TCTGAAGCCC TTCGAGCGGG
2221 ACATCTCCAC CGAGATCTAT CAGGCCGCA GCACCCCTG TAACGGCGTG GAAGGCTTCA
2281 ACTGCTACTT CCCACTGCAG TCCTACGGCT TTCAGCCAC AAATGGCGTG GGCTATCAGC
2341 CCTACAGAGT GGTGGTGCTG AGCTTCGAAC TGCTGCATGC CCCTGCCACA GTGTGCGGCC
2401 CTAAGAAAAG CACCAATCTC GTGAAGAACA AATGCGTAA CTCCACCAT CACCATCACC
2461 ATggttccgg tggagcacat attgtgatgg ttgacgctta caagccaacc aaataatgac
```

2521 tcgagCTAGC AGATCTTTTT CCTCTGCCA AAAATTATGG GGACATCATG AAGCCCCTTG  
2581 AGCATCTGAC TTCTGGCTAA TAAAGGAAAT TTATTTTCAT TGCAATAGTG TGTTGGAATT  
2641 TTTTGTGTCT CTCACTCGGA AGGACATATG GGAGGGCAAA TCATTTAAAA CATCAGAATG  
2701 AGTATTTGGT TTAGAGTTTG GCAACATATG CCCATATGCT GGCTGCCATG AACAAAGGTT  
2761 GGCTATAAAG AGGTCATCAG TATATGAAAC AGCCCCCTGC TGTCCATTCC TTATTCCATA  
2821 GAAAAGCCTT GACTTGAGGT TAGATTTTTT TTATTTTTG TTTTGTGTTA TTTTTTCTT  
2881 TAACATCCCT AAAATTTTCC TTACATGTTT TACTAGCCAG ATTTTCTC CTCTCCTGAC  
2941 TACTCCCAGT CATAGCTGTC CCTCTTCTCT TATGGAGATC CCTCGACCTG CAGCCCAAGC  
3001 TTGGCGTAAT CATGGTCATA GCTGTTTCT GTGTGAAATT GTTATCCGCT CACAATTCCA  
3061 CACAACATAC GAGCCGGAAG CATAAAGTGT AAAGCCTGGG GTGCCTAATG AGTGAGCTAA  
3121 CTCACATTA TTGCGTTGCG CTCACTGCCC GCTTTCAGT CGGGAAACCT GTCGTGCCAG  
3181 CGGATCCGCA TCTCAATTAG TCAGCAACCA TAGTCCCGCC CTAACCTCCG CCCATCCCGC  
3241 CCTAACTCC GCCCAGTTC GCCCATTCTC CGCCCCATGG CTGACTAATT TTTTTATTT  
3301 ATGCAGAGGC CGAGGCCGCC TCGGCCTCTG AGCTATTCCA GAAGTAGTGA GGAGGCTTTT  
3361 TTGGAGGCCT AGGCTTTTGC AAAAAGCTAA CTTGTTTATT GCAGCTTATA ATGTTACAA  
3421 ATAAAGCAAT AGCATCACAA ATTTACAAA TAAAGCATT TTTTACTGC ATTCTAGTTG  
3481 TGTTTTGTCC AAACATCA ATGTATCTTA TCATGTCTGG ATCCGCTGCA TTAATGAATC  
3541 GGCCAACGCG CGGGGAGAGG CGGTTTGCCT ATTGGGCGCT CTTCCGCTC CTCGCTCACT  
3601 GACTCGCTGC GCTCGTCTG TCGGCTGCG CGAGCGGTAT CAGCTCACTC AAAGGCGGTA  
3661 ATACGTTAT CCACAGAATC AGGGGATAAC GCAGGAAAGA ACATGTGAGC AAAAGGCCAG  
3721 CAAAAGGCCA GGAACGTAA AAAGGCCGCG TTGCTGGCGT TTTCCATAG GCTCCGCCCC  
3781 CCTGACGAGC ATCACAAAA TCGACGCTCA AGTCAGAGGT GGCGAAACCC GACAGGACTA  
3841 TAAAGATACC AGGCGTTTCC CCTGGAAGC TCCCTCGTGC GCTCTCTGT TCCGACCCTG  
3901 CCGCTTACC GATACCTGTC CGCTTTTCT CCTTCGGAA GCGTGCGCT TTCTCATAGC  
3961 TCACGCTGTA GGTATCTCAG TTCGGTGTAG GTCGTTGCT CCAAGCTGGG CTGTGTGCAC  
4021 GAACCCCCG TTCAGCCCGA CCGTGCGCC TTATCCGGTA ACTATCGTCT TGAGTCCAAC  
4081 CCGTAAGAC ACGACTTATC GCCACTGGCA GCAGCCACTG GTAACAGGAT TAGCAGAGCG  
4141 AGGTATGTAG GCGGTGCTAC AGAGTTCTTG AAGTGGTGGC CTAACACGG CTACACTAGA  
4201 AGAACAGTAT TTGGTATCTG CGCTCTGCTG AAGCCAGTTA CCTTCGGAAA AAGAGTTGGT  
4261 AGCTTTGAT CCGGCAAACA AACCACCGCT GGTAGCGGTG GTTTTTTGT TTGCAAGCAG  
4321 CAGATTACGC GCAGAAAAA AGGATCTCAA GAAGATCCTT TGATCTTTC TACGGGGTCT  
4381 GACGCTCAGT GGAACGAAAA CTCACGTAA GGGATTTTGG TCATGAGATT ATCAAAAAGG  
4441 ATCTTACCT AGATCTTTT AAATTAATA TGAAGTTTA AATCAATCTA AAGTATATAT  
4501 GAGTAAACTT GGTCTGACAG TTACCAATGC TTAATCAGTG AGGCACCTAT CTCAGCGATC  
4561 TGTCTATTC GTTCATCCAT AGTTGCTGA CTCCCCGTCG TGTAGATAAC TACGATACGG  
4621 GAGGGCTTAC CATCTGGCC CAGTGCTGCA ATGATACCGC GAGACCCACG CTCACCGGCT  
4681 CCAGATTTAT CAGCAATAA CCAGCCAGCC GGAAGGGCCG AGCGCAGAAG TGGTCTGCA  
4741 ACTTTATCCG CCTCCATCCA GTCTATTAAT TGTTGCCGGG AAGCTAGAGT AAGTAGTTG  
4801 CCAGTTAATA GTTTGCGCAA CGTTGTTGCC ATTGCTACAG GCATCGTGGT GTCACGCTCG  
4861 TCGTTTGGTA TGGCTTCACT CAGTCCGGT TCCCAACGAT CAAGGCGAGT TACATGATCC  
4921 CCCATGTTGT GCAAAAAGC GGTTAGCTCC TTCGGTCTC CGATCGTTGT CAGAAGTAAG  
4981 TTGGCCGCAG TGTTATCACT CATGGTTATG GCAGCACTGC ATAATTCTCT TACTGTCATG  
5041 CCATCCGTA GATGCTTTTC TGTGACTGGT GAGTACTCAA CCAAGTCATT CTGAGAATAG  
5101 TGTATGCGGC GACCGAGTTG CTCTTGCCG GCGTCAATAC GGGATAATAC CGCGCCACAT  
5161 AGCAGAACTT TAAAGTGCT CATCATTGGA AAACGTTCTT CGGGGCGAAA ACTCTCAAGG  
5221 ATCTTACCG TGTTGAGATC CAGTTCGATG TAACCCACTC GTGCACCAA CTGATCTTCA  
5281 GCATCTTTTA CTTTACCAG CGTTTCTGGG TGAGCAAAA CAGGAAGGCA AAATGCCGCA  
5341 AAAAAGGGAA TAAGGGGAC ACGGAAATGT TGAATACTCA TACTTTCCT TTTTCAATAT  
5401 TATTGAAGCA TTTATCAGGG TTATTGTCTC ATGAGCGGAT ACATATTTGA ATGTATTTAG  
5461 AAAAATAAAC AAATAGGGGT TCCGCGACA TTTCCCGAA AAGTGCCACC TG

//
